# Supplementary material for: Subcellular electrical stimulation of neurons enhances the myelination of axons by oligodendrocytes
Source: PubMed Central journal article supplement (PMC5495216; doi:10.1371/journal.pone.0179642), 2017-07-03
Supplement: pone.0179642.s008.pdf [file pone.0179642.s008.pdf]

1 **S1 File. Methods: cAMP Level Measurement.**

2 Measurement was performed on neurons 1 hour after ESTIM. Neurons were rinsed with PBS and  
3 incubated for 10 min with 1 mM phenylmethylsulfonyl fluoride (PMSF, Cell Signaling) in lysis buffer  
4 (Cell Signaling). The cell lysate was then analyzed with Cyclic AMP XP<sup>®</sup> Assay Kit (Cell Signaling)  
5 following manufacturer's instructions.
